# Supplementary material for: DFT studies of electronic and nonlinear optical properties of a novel class of excess electron compounds based on multi-alkali metal atoms-doped Janus face C13H10F12
Source: Royal Society of Chemistry journal article supplement (doi:10.1039/d2nj02671f), 2022-01-01
Supplement: d2nj02671f1.pdf [file d2nj02671f1.pdf]

## SUPPORTING INFORMATION

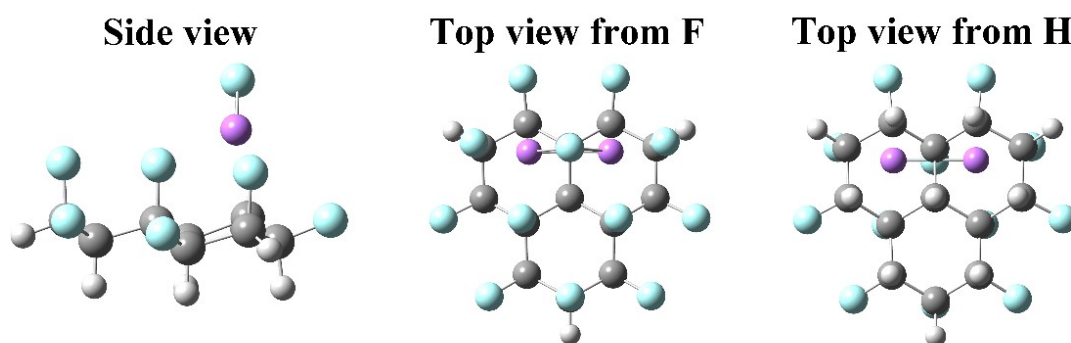

**Figure S1** Optimized structures of the 2Li-1 system.

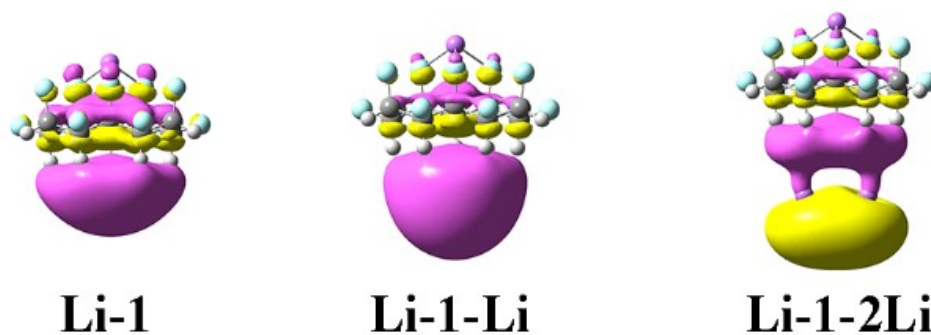

**Figure S2** The highest occupied molecular orbitals (HOMOs) of the Li-1-nLi (n=0,1,2) compounds.

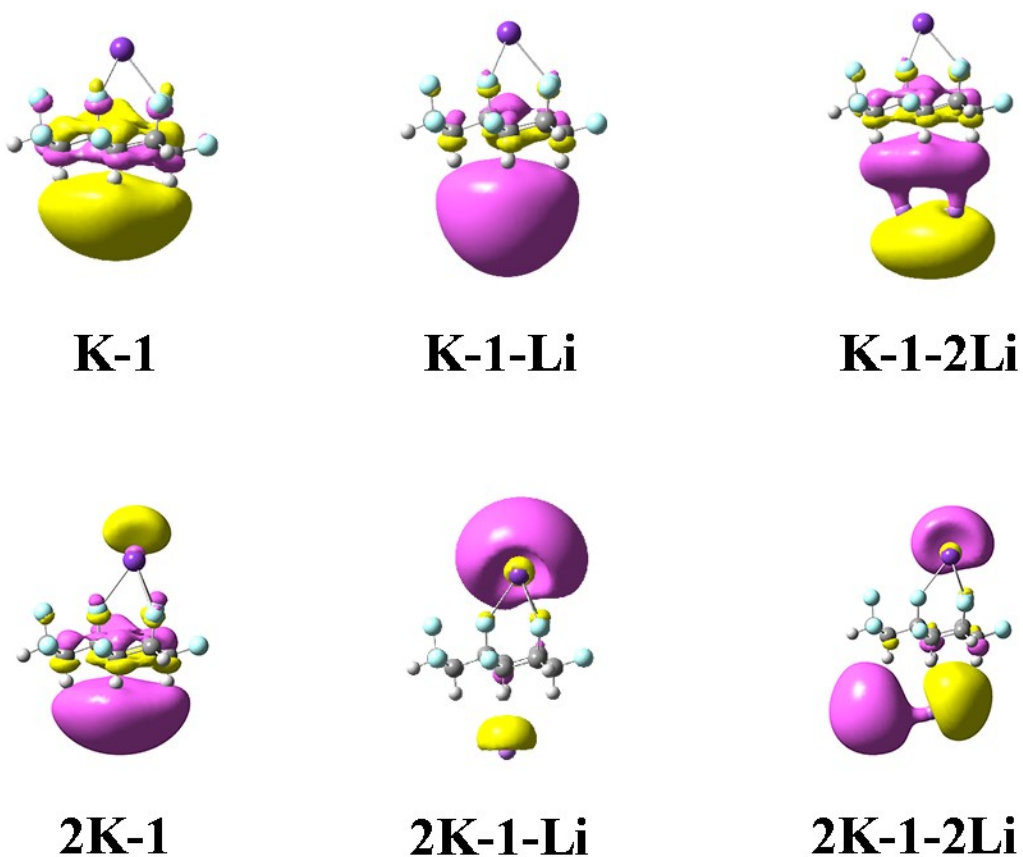

**Figure S3** The highest occupied molecular orbitals (HOMOs) of the  $mK-1-nLi$  ( $m=1,2$ ;  $n=0,1,2$ ) compounds.

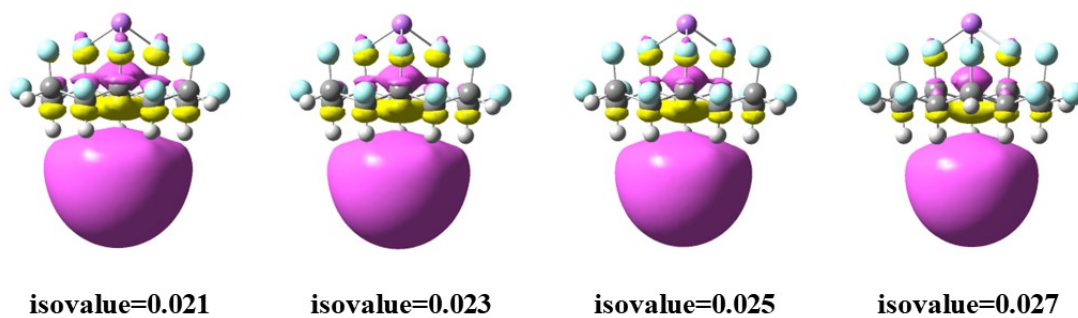

**Figure S4** The HOMO of the Li-1-Li compound.

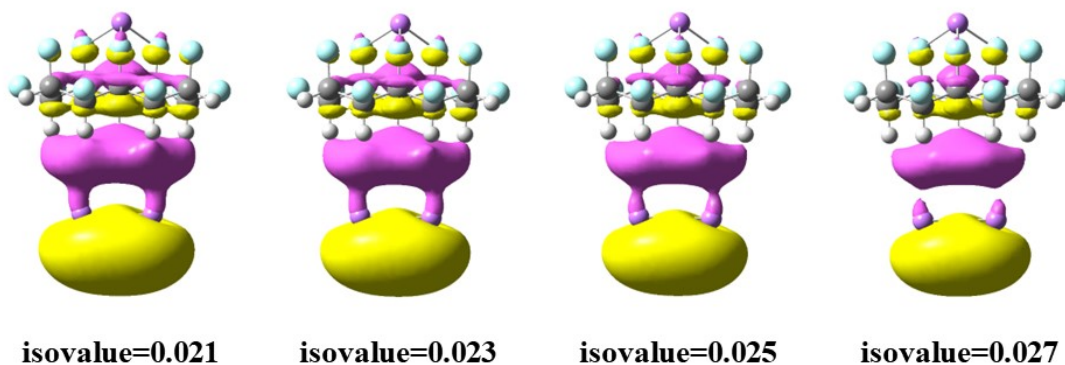

**Figure S5** The HOMO of the Li-1-2Li compound.

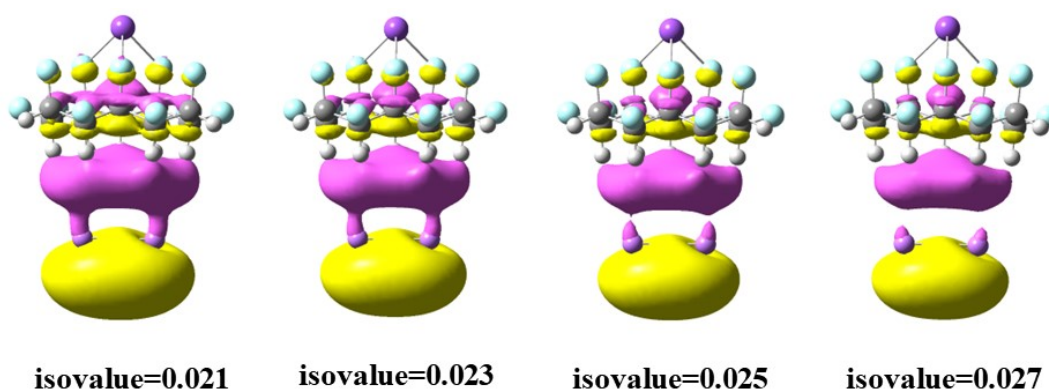

**Figure S6** The HOMO of the Na-1-2Li compound.

**Table S1** The first hyperpolarizability ( $\beta_0$ , in au) of the Li-F<sub>6</sub>C<sub>6</sub>H<sub>6</sub> system is calculated by the LC-tHCTH, wb97x, wb97xd and M11 method with different basis sets.

| Basis sets        | LC-tHCTH | wb97x         | wb97xd | M11    |
|-------------------|----------|---------------|--------|--------|
| 6-31G             | 165401   | 124695        | 53735  | 96044  |
| 6-31G(d)          | 112886   | 69674         | 60582  | 53591  |
| 6-31+G(d)         | 751879   | 487654        | 214623 | 84071  |
| 6-31+G(d, p)      | 761595   | 513811        | 225164 | 89209  |
| 6-31++G(d, p)     | 766493   | <b>695952</b> | 355695 | 123341 |
| 6-311+G(d)        | 743688   | <b>691799</b> | 311039 | 136206 |
| 6-311+G(d, p)     | 734650   | <b>698235</b> | 307644 | 141028 |
| 6-311++G(d, p)    | 718381   | 981632        | 483811 | 165808 |
| 6-311++G(2d, 2p)  | 472783   | 502871        | 250376 | 71778  |
| 6-311++G(3df,3pd) | 1371794  | 558487        | 326106 | 44972  |

**Table S2** The first hyperpolarizability ( $\beta_0$ , in au) of the Li-1 system is calculated by the **wb97x** method with different basis sets.

| <b>Basis sets</b> | <b><math>\beta_0</math></b> |
|-------------------|-----------------------------|
| 6-31++G(d, p)     | <b>16030</b>                |
| 6-311+G(d)        | 4770                        |
| 6-311+G(d, p)     | 4486                        |

**Table S3** Energy calculations of the different spin states of  $mM_F-1-nLi$  compounds.

|           | <i>singlet</i> | <i>triplet</i> | <i>quintet</i> | <i>doublet</i> | <i>quartet</i> |
|-----------|----------------|----------------|----------------|----------------|----------------|
| Li-1-Li   | -1713.983932   | -1713.939962   |                |                |                |
| Na-1-Li   | -1868.719049   | -1868.675334   |                |                |                |
| K-1-Li    | -2306.352663   | -2306.308657   |                |                |                |
| Li-1-2Li  |                |                |                | -1721.467622   | -1721.428465   |
| Na-1-2Li  |                |                |                | -1876.202782   | -1876.164361   |
| K-1-2Li   |                |                |                | -2313.836559   | -2313.798634   |
| 2Na-1     | -2023.449447   | -2023.445493   |                |                |                |
| 2K-1      | -2898.699215   | -2898.700079   |                |                |                |
| 2Na-1-Li  |                |                |                | -2030.977592   | -2030.927304   |
| 2K-1-Li   |                |                |                | -2906.230482   | -2906.182238   |
| 2Na-1-2Li | -2038.464404   | -2038.477452   | -2038.418223   |                |                |
| 2K-1-2Li  | -2913.716298   | -2913.731076   | -2913.673185   |                |                |
